# Supplementary material for: An Aquaporin Gene (KoPIP2;1) Isolated from Mangrove Plant Kandelia obovata Had Enhanced Cold Tolerance of Transgenic Arabidopsis thaliana
Source: MDPI journal article supplement (doi:10.3390/bioengineering10070878), 2023-07-24
Supplement: s1 [file s1]

Supplementary Materials

# An Aquaporin Gene (*KoPIP2;1*) Isolated from Mangrove Plant *Kandelia obovata* Had Enhanced Cold Tolerance of Transgenic *Arabidopsis thaliana*

Jiao Fei <sup>1,2,3</sup>, Youshao Wang <sup>1,2,3,\*</sup>, Hao Cheng <sup>1,2,3,\*</sup>, Hui Wang <sup>1</sup>, Meilin Wu <sup>1,2,3</sup>, Fulin Sun <sup>1,2,3</sup> and Cuici Sun <sup>1,2,3</sup>

<sup>1</sup> State Key Laboratory of Tropical Oceanography, South China Sea Institute of Oceanology, Chinese Academy of Sciences, Guangzhou 510301, China; feijiao@scsio.ac.cn (J.F.); wanghui224@mails.ucas.ac.cn (H.W.); mlwu@scsio.ac.cn (M.-L.W.); flsun@scsio.ac.cn (F.-L.S.); scuici@scsio.ac.cn (C.-C.S.)

<sup>2</sup> Southern Marine Science and Engineering Guangdong Laboratory (Guangzhou), Guangzhou 511458, China

<sup>3</sup> Innovation Academy of South China Sea Ecology and Environmental Engineering, Chinese Academy of Sciences, Guangzhou 510301, China

\* Correspondence: yswang@scsio.ac.cn (Y.-S.W.); chenghao@scsio.ac.cn (H.C.); Tel.: +86-20-8902-3102 (Y.-S.W.); +86-20-8902-3132 (H.C.)

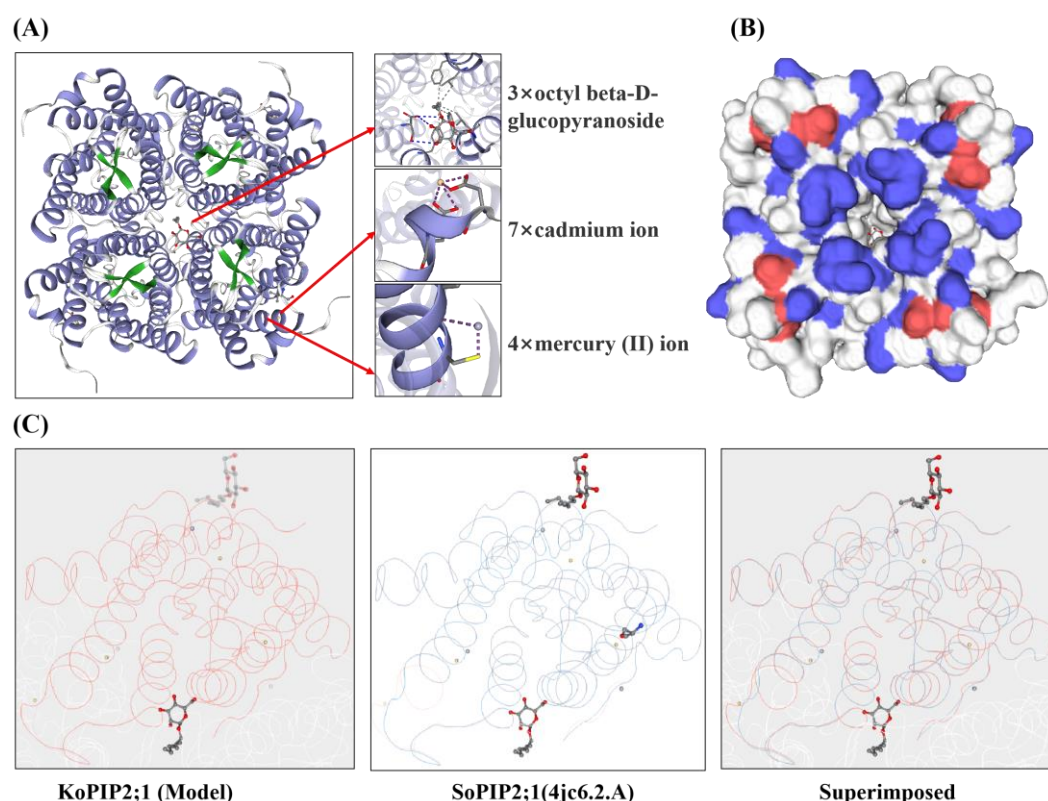

**Figure S1.** Prediction of 3D structure of KoPIP2;1 and comparison with its template. The 3D models of KoPIP2;1 and its template (SoPIP2;1 (*Spinacia oleracea* PIP2;1), SMTL id: 4jc6.2.A) were produced by the homology modeling SWISS-MODEL. (A) Left was the 3D model of KoPIP2;1 predicted ribbon structures, with  $\alpha$ -helix (purple) and  $\beta$ -strand (green), random coil (white). Right was close-up view of octyl  $\beta$ -D-glucopyranoside-binding, cadmium-binding and mercury-binding based on homology modeling. Cadmium and mercury were shown as yellow and purple spheres, respectively. Ligands for the heavy atoms were shown in stick representation being labelled. (B) View of the surface topology of KoPIP2;1 showing the distribution of the electrostatic potentials. Protein surface was colored according to areas charged positively (blue), negatively (red) and neutrally (white). (C) Figures were predicted trace structures of KoPIP2;1 and its template SoPIP2;1 and their superimposition.
